# Supplementary material for: Coupling effects of the electric field and bending on the electronic and magnetic properties of penta-graphene nanoribbons
Source: Royal Society of Chemistry journal article supplement (doi:10.1039/c7cp03404k), 2017-01-01
Supplement: c7cp03404k1.pdf [file c7cp03404k1.pdf]

# Supporting Information

## Coupling effects of electric field and bending on the electronic and magnetic properties of penta-graphene nanoribbons

C. He<sup>1\*</sup>, X. F. Wang<sup>1</sup>, W. X. Zhang<sup>2\*</sup>

<sup>1</sup> *State Key Laboratory for Mechanical Behavior of Materials, School of Materials Science and Engineering, Xi'an Jiaotong University, Xi'an 710049, China*

<sup>2</sup> *School of Materials Science and Engineering, Chang'an University, Xi'an 710064, China*

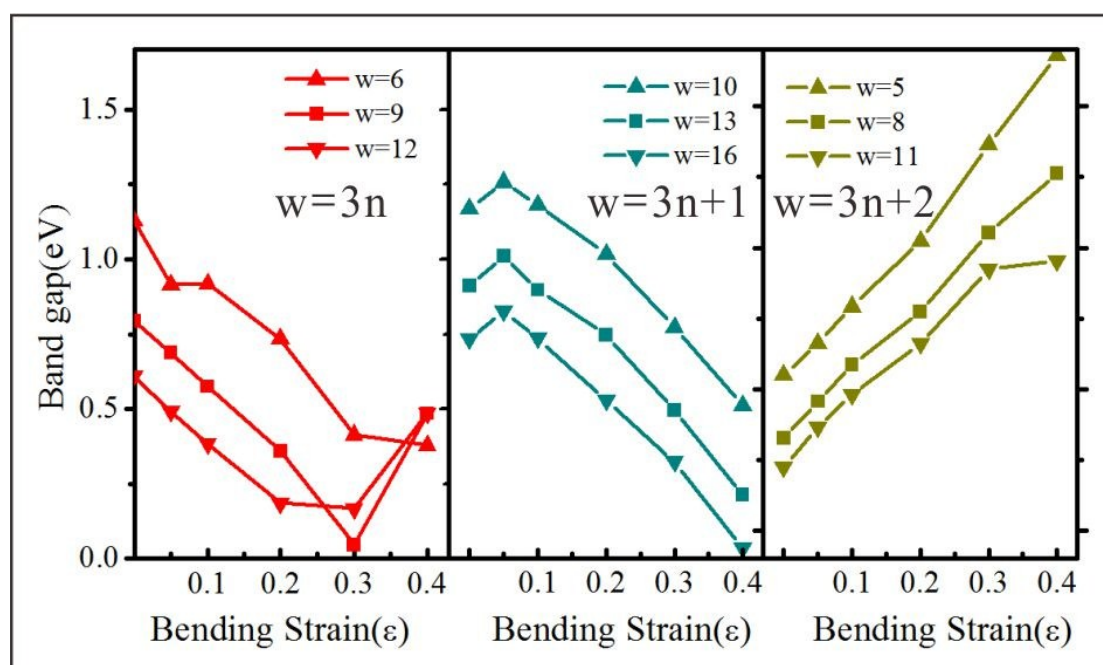

\*Corresponding Authors: C. He (hecheng@mail.xjtu.edu.cn), or W. X. Zhang (wxzhang@chd.edu.cn)

Figure S1. The band gap variation for armchair GNRs under bending. Red, green, orange corresponds to width categories of  $3n$ ,  $3n+1$ ,  $3n+2$ . Different width among the same category is denoted by different symbols.

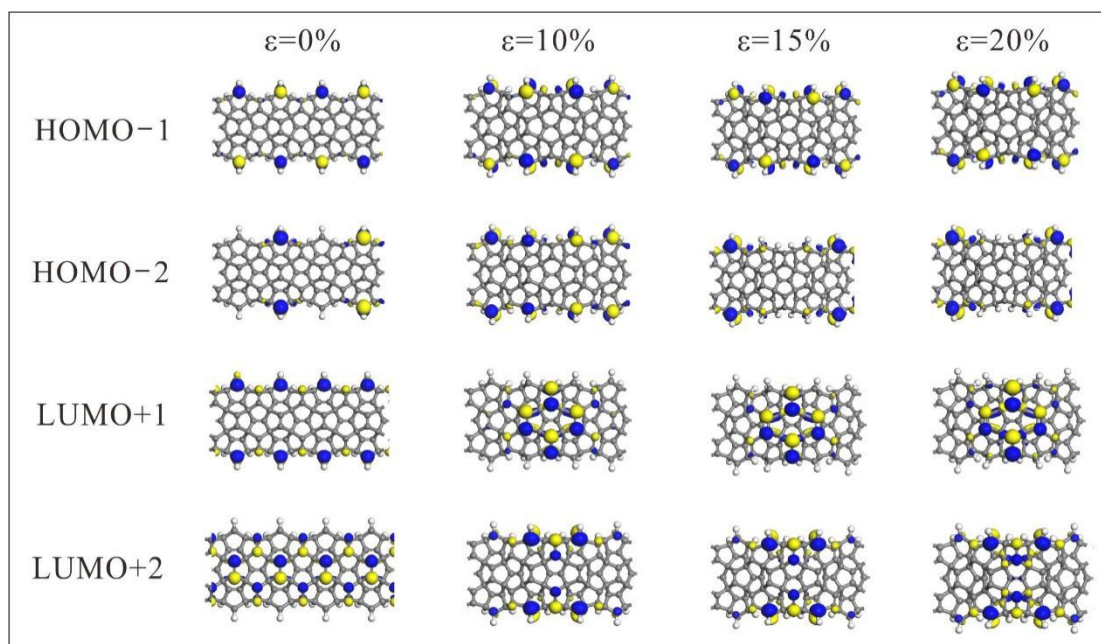

Figure S2. Charge densities of HOMO-1, HOMO-2, LUMO+1, LUMO+2 at the Gamma point for P-GNRs under bending strain of 0%, 10%, 15%, and 20%, respectively. Blue and yellow denote positive and negative wave function contours, respectively. The isosurface value is set to be  $\pm 0.02 \text{ e}/\text{\AA}^3$ .

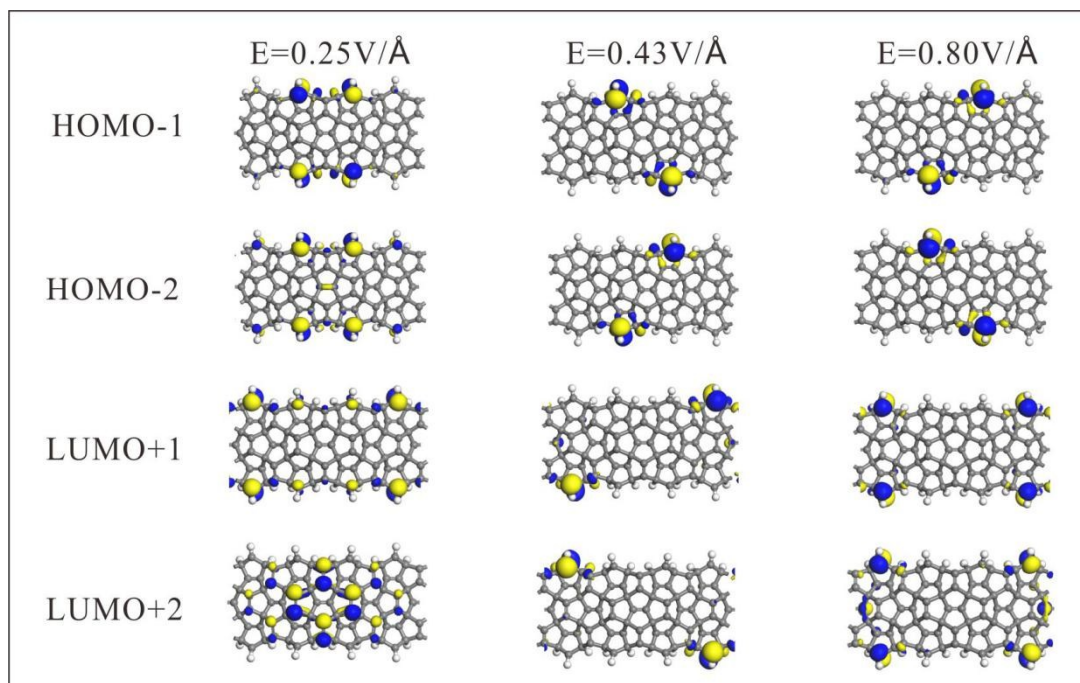

Figure S3. Charge densities of HOMO-1, HOMO-2, LUMO+1 and LUMO+2 at the Gamma point for bending P-GNRs ( $\epsilon=10\%$ ) with electric field (E)  $0.25\text{V}/\text{\AA}$ ,  $0.43\text{V}/\text{\AA}$ , and  $0.80\text{V}/\text{\AA}$ , respectively. Blue and yellow denote positive and negative wave function contours, respectively. The isosurface value is set to be  $\pm 0.02 \text{ e}/\text{\AA}^3$ .
